# Supplementary material for: Effect of Fungicide Application on Lowbush Blueberries Soil Microbiome
Source: MDPI journal article supplement (doi:10.3390/microorganisms9071366), 2021-06-23
Supplement: s1 [file s1]

Table S1: Soil characteristics of sampling site

| Parameter                             | Value            |
|---------------------------------------|------------------|
| pH                                    | $4.98 \pm 0.078$ |
| Organic Matter (%)                    | $3.95 \pm 0.071$ |
| P <sub>2</sub> O <sub>5</sub> (kg/ha) | $290 \pm 67.9$   |
| K <sub>2</sub> O (kg/ha)              | $135 \pm 24.7$   |
| Calcium (kg/ha)                       | $170 \pm 98.99$  |
| Magnesium (kg/ha)                     | $35 \pm 14.1$    |
| Sodium (kg/ha)                        | $< 16$           |
| Sulfur (kg/ha)                        | $78 \pm 5.66$    |
| Aluminum (ppm)                        | $1955 \pm 33.9$  |
| Boron (ppm)                           | $< 0.50$         |
| Copper (ppm)                          | $0.23 \pm 0.064$ |
| Iron (ppm)                            | $116 \pm 19.8$   |
| Manganese (ppm)                       | $23 \pm 8.5$     |
| Zinc (ppm)                            | $1.22 \pm 0.16$  |
| CEC (meq/100 g)                       | $5.30 \pm 0.283$ |

Results taken from the average of two soil tests of bulked soil from sample site
